# Supplementary material for: Ion-Exchange-Induced Transformation and Mechanism of Cooperative Crystal Chemical Adaptation in Sitinakite: Theoretical and Experimental Study
Source: MDPI journal article supplement (doi:10.3390/min12020248), 2022-02-15
Supplement: s1 [file s1]

**Table S1.** Atomic coordinates for sitinakite.

| Site | occupancy          | x/a           | y/b        | z/c           | Ueq        |
|------|--------------------|---------------|------------|---------------|------------|
| Ti1  | Ti                 | 0.63875(8)    | 0.63875(8) | 0.65337(7)    | 0.0069(3)  |
| Si1  | Si                 | $\frac{1}{2}$ | 0          | $\frac{3}{4}$ | 0.0094(4)  |
| Na1  | Na                 | $\frac{1}{2}$ | 0          | $\frac{1}{2}$ | 0.0417(11) |
| Na2  | Na <sub>0.24</sub> | 0.8881(15)    | 0.8881(15) | $\frac{1}{2}$ | 0.032(6)   |
| K1   | K <sub>0.15</sub>  | 0.955(3)      | 0.955(3)   | 0.819(3)      | 0.147(15)  |
| O1   | O                  | 0.6210(3)     | 0.8825(3)  | 0.67001(19)   | 0.0124(6)  |
| O2   | O                  | 0.6149(3)     | 0.3851(3)  | 0.6710(3)     | 0.0106(8)  |
| O3   | O                  | 0.6425(5)     | 0.6425(5)  | $\frac{1}{2}$ | 0.0124(11) |
| O4   | O                  | 0.7683(6)     | 0.2317(6)  | $\frac{1}{2}$ | 0.0391(19) |
| O5   | O <sub>0.66</sub>  | 0             | 0          | $\frac{3}{4}$ | 0.033(4)   |
| O6   | O <sub>0.50</sub>  | 0             | 0          | 0.922(6)      | 0.23(4)    |

**Table S2.** Atomic coordinates for La-sitinakite.

| Site                | occupancy          | x/a           | y/b           | z/c           | Ueq        |
|---------------------|--------------------|---------------|---------------|---------------|------------|
| Ti1                 | Ti                 | $\frac{1}{2}$ | 0.63651(12)   | 0.34606(7)    | 0.0135(3)  |
| Ti2                 | Ti                 | 0.64402(12)   | $\frac{1}{2}$ | 0.15404(7)    | 0.0116(3)  |
| Si1                 | Si                 | $\frac{3}{4}$ | $\frac{3}{4}$ | 0.25440(18)   | 0.0259(5)  |
| La1                 | La <sub>0.42</sub> | $\frac{1}{2}$ | 0.87172(13)   | $\frac{1}{2}$ | 0.0168(4)  |
| La2                 | La <sub>0.13</sub> | 0.7004(5)     | 0.7623(4)     | 0             | 0.0365(13) |
| La3                 | La <sub>0.11</sub> | 0.8740(5)     | $\frac{1}{2}$ | 0             | 0.0150(18) |
| O1                  | O                  | 0.6279(4)     | 0.7523(4)     | 0.3314(3)     | 0.0240(10) |
| O2                  | O                  | 0.7512(4)     | 0.6324(4)     | 0.1729(3)     | 0.0256(9)  |
| O3                  | O                  | $\frac{1}{2}$ | 0.6400(8)     | $\frac{1}{2}$ | 0.0310(19) |
| O4                  | O                  | 0.3843(5)     | $\frac{1}{2}$ | 0.3285(3)     | 0.0152(13) |
| O5                  | O                  | $\frac{1}{2}$ | 0.3862(5)     | 0.1681(3)     | 0.0160(12) |
| O6                  | O                  | 0.6503(10)    | $\frac{1}{2}$ | 0             | 0.048(3)   |
| O7 <sub>0.5</sub>   | O                  | 0             | 0.704(2)      | $\frac{1}{2}$ | 0.075(9)   |
| O8 <sub>0.5</sub>   | O                  | 0.9101(12)    | 0.7442(11)    | 0             | 0.023(2)   |
| O9 <sub>0.12</sub>  | O                  | 0             | 0.643(7)      | 0.147(5)      | 0.067(6)   |
| O10 <sub>0.5</sub>  | O                  | $\frac{1}{2}$ | 0             | 0.3283(19)    | 0.067(6)   |
| O11 <sub>0.5</sub>  | O                  | 0.7154(12)    | 0.9694(13)    | $\frac{1}{2}$ | 0.043(4)   |
| O12 <sub>0.5</sub>  | O                  | $\frac{3}{4}$ | $\frac{3}{4}$ | $\frac{1}{2}$ | 0.037(4)   |
| O13 <sub>0.29</sub> | O                  | 0.728(4)      | 0.868(4)      | $\frac{1}{2}$ | 0.067(6)   |

**Table S3.** Selected interatomic distances for sitinakite.

|         |           |    |         |           |    |
|---------|-----------|----|---------|-----------|----|
| Ti1–O1  | 1.921(3)  | ×2 | Na2–O1  | 2.922(9)  | ×4 |
| Ti1–O2  | 2.003(2)  | ×2 | Na2–O3  | 2.715(18) |    |
| Ti1–O2  | 2.127(3)  |    | Na2–O4  | 2.844(10) | ×2 |
| Ti1–O3  | 1.8435(8) |    | <Na2–O> | 2.870     |    |
| <Ti1–O> | 1.970     |    |         |           |    |
|         |           |    | K1–O1   | 3.22(3)   | ×2 |
| Si1–O1  | 1.631(3)  | ×4 | K1–O1   | 3.36(2)   |    |
|         |           |    | K1–O1   | 2.907(1)  |    |
| Na1–O1  | 2.431(2)  | ×4 | K1–O4   | 3.00(3)   | ×2 |
| Na1–O4  | 2.7708(5) | ×2 | K1–O6   | 2.94(8)   |    |
| <Na1–O> | 2.544     |    | K1–O6   | 3.15(8)   |    |
|         |           |    | <K1–O>  | 3.099     |    |

**Table S4.** Selected interatomic distances for La-sitinakite.

|         |          |    |         |           |    |
|---------|----------|----|---------|-----------|----|
| Ti1–O5  | 2.122(4) |    | La1–O11 | 2.611(11) | ×2 |
| Ti1–O4  | 1.988(4) | ×2 | La1–O10 | 2.479(19) | ×2 |
| Ti1–O1  | 1.914(4) | ×2 | La1–O12 | 3.069(7)  |    |
| Ti1–O3  | 1.824(1) |    | <La1–O> | 2.693     |    |
| <Ti1–O> | 1.958    |    |         |           |    |

|         |           |    |         |           |    |
|---------|-----------|----|---------|-----------|----|
|         |           |    | La2–O6  | 2.953(5)  | ×2 |
| Ti2–O5  | 2.034(4)  | ×2 | La2–O2  | 2.415(4)  |    |
| Ti2–O4  | 2.089(4)  |    | La2–O2  | 2.563(5)  |    |
| Ti2–O6  | 1.826(1)  |    | La2–O7  | 2.242(7)  | ×2 |
| Ti2–O2  | 1.896(4)  | ×2 | La2–O8  | 2.322(15) |    |
| <Ti2–O> | 1.963     |    | La2–O9  | 3.01(4)   | ×2 |
|         |           |    | <La2–O> | 2.634     |    |
| Si1–O2  | 1.619(4)  | ×2 |         |           |    |
| Si1–O1  | 1.627(4)  | ×2 | La3–O6  | 2.468(12) |    |
| <Si1–O> | 1.623     |    | La3–O7  | 2.65(2)   | ×2 |
|         |           |    | La3–O8  | 2.730(12) | ×2 |
| La1–O1  | 2.779(4)  | ×4 | La3–O9  | 2.73(6)   | ×4 |
| La1–O3  | 2.562(10) |    | <La3–O> | 2.683     |    |

**Table S5.** Anisotropic displacement parameters for sitinakite.

| position | $U_{11}$   | $U_{22}$  | $U_{33}$   | $U_{23}$    | $U_{13}$  | $U_{12}$  |
|----------|------------|-----------|------------|-------------|-----------|-----------|
| Ti1      | 0.0072(4)  | 0.0072(4) | 0.0062(5)  | 0.0004(2)   | 0.0004(2) | 0.0015(3) |
| Si1      | 0.0120(10) | 0.0082(9) | 0.0080(8)  | 0.000       | 0.000     | 0.000     |
| Na1      | 0.078(3)   | 0.033(2)  | 0.0139(15) | 0.000       | 0.000     | 0.014(2)  |
| Na2      | 0.040(8)   | 0.040(8)  | 0.015(8)   | 0.000       | 0.000     | −0.008(8) |
| K1       | 0.070(12)  | 0.070(12) | 0.30(5)    | 0.014(16)   | 0.014(16) | 0.030(1)  |
| O1       | 0.014(1)   | 0.013(1)  | 0.010(1)   | −0.0004(10) | 0.002(1)  | 0.000     |
| O2       | 0.011(1)   | 0.011(1)  | 0.010(2)   | −0.0001(10) | 0.000     | 0.000     |
| O3       | 0.014(2)   | 0.014(2)  | 0.010(2)   | 0.000       | 0.000     | 0.000(2)  |
| O4       | 0.050(3)   | 0.050(3)  | 0.018(3)   | 0.000       | 0.000     | 0.029(4)  |
| O5       | 0.027(7)   | 0.027(7)  | 0.045(10)  | 0.000       | 0.000     | 0.000     |
| O6       | 0.15(3)    | 0.15(3)   | 0.40(10)   | 0.000       | 0.000     | −0.14(4)  |

**Table S6.** Anisotropic displacement parameters for La-sitinakite.

| site | $U_{11}$ | $U_{22}$  | $U_{33}$  | $U_{23}$   | $U_{13}$  | $U_{12}$   |
|------|----------|-----------|-----------|------------|-----------|------------|
| Ti1  | 0.009(1) | 0.025(1)  | 0.0069(5) | −0.0002(4) | 0.000     | 0.000      |
| Ti2  | 0.017(1) | 0.0132(9) | 0.0046(5) | 0.000      | 0.0016(4) | 0.000      |
| La1  | 0.023(1) | 0.0156(9) | 0.0115(6) | 0.000      | 0.000     | 0.000      |
| Si1  | 0.014(1) | 0.020(1)  | 0.044(1)  | 0.000      | 0.000     | −0.0056(7) |
| La3  | 0.011(4) | 0.016(5)  | 0.018(3)  | 0.000      | 0.000     | 0.000      |
| O5   | 0.025(3) | 0.009(3)  | 0.013(2)  | −0.001(2)  | 0.000     | 0.000      |
| O4   | 0.021(4) | 0.016(3)  | 0.009(2)  | 0.000      | 0.001(2)  | 0.000      |
| O6   | 0.028(6) | 0.10(1)   | 0.015(3)  | 0.000      | 0.000     | 0.000      |
| O2   | 0.018(3) | 0.024(2)  | 0.034(2)  | 0.001(2)   | 0.002(2)  | −0.004(1)  |
| O1   | 0.014(2) | 0.022(3)  | 0.036(2)  | −0.003(2)  | 0.000(1)  | −0.003(1)  |
| O3   | 0.069(8) | 0.014(5)  | 0.010(3)  | 0.000      | 0.000     | 0.000      |
| O11  | 0.046(6) | 0.05(1)   | 0.031(4)  | 0.000      | 0.000     | −0.034(5)  |
| O10  | 0.07(1)  | 0.077(9)  | 0.051(8)  | 0.000      | 0.000     | 0.000      |
| O7   | 0.14(3)  | 0.04(1)   | 0.04(1)   | 0.000      | 0.000     | 0.000      |
| O8   | 0.028(6) | 0.031(6)  | 0.009(4)  | 0.000      | 0.000     | −0.003(4)  |
| La2  | 0.059(3) | 0.039(2)  | 0.010(2)  | 0.000      | 0.000     | 0.003(2)   |
| O12  | 0.036(7) | 0.073(9)  | 0.003(4)  | 0.000      | 0.000     | −0.045(7)  |
| O9   | 0.07(1)  | 0.077(9)  | 0.051(8)  | 0.000      | 0.000     | 0.000      |
| O13  | 0.07(1)  | 0.077(9)  | 0.051(8)  | 0.000      | 0.000     | 0.000      |
